# Supplementary material for: Assessment of Drivers of Antimicrobial Usage in Poultry Farms in the Mekong Delta of Vietnam: A Combined Participatory Epidemiology and Q-Sorting Approach
Source: Front Vet Sci. 2019 Mar 25;6:84. doi: 10.3389/fvets.2019.00084 (PMC6442645; doi:10.3389/fvets.2019.00084)
Supplement: Supplementary Table 2 — Raw data of Q-sorting interviews. [file Data_Sheet_1.CSV]

	Q2	Q3	Q4	Q5	Q6	Q7	Q8	Q9	Q10	Q11	Q14	Q15	Q16	Q17	Q18	Q19	Q20	Q21	Q22	Q23	Q25	Q26	Q27	Q28	Q29	Q30	Q31	Q32	Q33	Q34	Q35	Q36	Q37	Q38	Q39	Q40	Q41	Q42	Q43	Q44	Q45	Q46	Q47	Q48	Q49	Q50	Q51	Q52	Q53
S1	0	0	3	0	0	-3	0	1	2	0	-3	0	1	3	1	2	3	1	1	2	1	3	1	1	2	-1	2	1	1	2	3	2	0	-1	0	1	1	1	0	1	-1	3	2	1	-1	-1	-1	-1	-1
S2	-2	0	0	3	-2	-1	-3	1	1	2	1	0	0	2	0	3	1	-3	1	1	3	3	3	-2	2	2	2	2	-2	0	1	3	0	-2	1	3	-1	-1	3	1	-1	1	0	-1	0	-1	-1	-1	0
S3	-3	0	0	3	-3	-2	-1	0	1	-1	-3	-2	-2	1	-2	0	0	-3	3	3	0	-1	-2	0	0	-2	0	-3	1	2	3	3	2	1	0	3	-3	1	3	0	-2	3	0	0	3	3	1	2	1
S4	0	0	1	-2	0	0	0	1	2	1	0	-1	1	-2	0	2	2	0	3	-2	-2	0	0	1	-1	0	2	0	-1	-2	0	-3	-2	0	-1	-2	0	-1	-2	1	-1	-1	-1	-1	-1	-3	-1	-2	0
S5	0	-1	1	0	0	0	0	2	3	0	0	0	2	2	2	1	1	1	2	0	1	-1	2	0	0	-1	1	0	0	3	-2	1	1	1	0	2	0	0	0	0	1	0	-1	3	1	0	3	0	0
S6	2	0	0	-1	3	1	0	2	1	0	-1	1	-1	1	0	3	1	2	1	-1	2	1	0	3	0	0	1	2	-1	0	-1	1	0	1	1	2	2	0	-1	2	-1	0	-1	-1	1	1	0	1	0
S7	-3	-3	-2	1	1	-1	0	-2	-2	-1	-1	3	0	1	2	-1	-1	-1	-1	2	-2	0	0	2	1	3	1	2	-1	2	-3	0	-1	-1	-1	-1	-2	0	1	0	-1	1	1	2	1	0	-2	-1	1
S8	3	1	-3	-1	1	1	-2	0	0	3	1	2	1	0	1	0	1	0	2	0	2	-1	1	2	1	2	1	0	0	-1	0	0	1	1	0	-1	0	0	-1	1	-1	2	0	0	0	0	1	1	-2
S9	1	-3	-2	2	-1	0	0	-1	0	2	2	1	1	0	1	0	1	-1	-1	0	3	-2	-1	-2	-1	3	1	-1	-2	-3	-3	-1	-1	-1	-1	0	-2	-1	2	2	0	2	0	1	3	0	0	0	1
S10	1	1	2	3	2	1	2	3	3	-1	1	2	1	0	1	2	1	1	2	1	1	-1	3	2	1	3	-2	2	-2	3	2	2	2	3	0	3	3	0	3	1	2	3	2	3	3	2	3	3	-1
S11	0	-1	-1	2	0	3	1	-3	-1	-1	0	-2	-2	1	-2	-2	0	0	-1	-1	0	0	-1	2	1	-1	-2	-2	0	-3	-1	0	-1	3	1	1	2	-2	2	2	-2	2	-2	1	2	-1	-2	1	0
S12	-1	-1	-2	1	-1	1	-2	0	1	1	-1	1	-3	0	-1	1	-1	-1	0	0	-3	2	1	1	1	0	-2	-2	1	2	1	1	2	1	0	-1	2	0	1	-2	0	2	0	0	1	3	-3	1	1
S13	-1	-1	-1	-3	-1	-1	-1	-1	0	-3	1	-2	-2	-3	-2	-2	0	-3	-3	-2	-1	-3	-3	-3	-2	-3	-1	-2	-3	-2	-3	-3	-1	-3	-2	-3	-1	-3	-3	-3	-3	-3	-3	-2	-3	-2	-2	-3	-3
S14	-3	-2	-2	-3	-2	2	3	-1	0	-2	-1	-1	2	-3	3	-2	-2	2	-3	-1	-3	-3	-3	-3	-1	-3	-3	0	-3	-1	-1	-3	0	-2	-2	-3	0	-3	-3	-3	2	-2	1	-3	-3	-2	-2	-2	-2
S15	2	-2	-3	-3	-3	-2	-1	-1	-1	-3	0	-1	-1	-2	-2	-3	-2	-1	-2	-3	-1	-3	-3	-3	-1	-3	-3	-1	-1	-2	-3	-3	-3	-2	-2	-3	-2	-1	-3	-3	-2	-3	-3	-3	-3	-3	-1	-2	-3
S16	0	1	3	-3	0	3	2	-1	-2	-3	-2	2	0	-2	-2	-2	-2	3	-2	-1	-1	-3	-2	-2	-1	-2	-1	1	-2	0	0	-1	2	-2	2	-2	0	0	-3	-3	2	-2	-1	-3	1	-2	3	2	-2
S17	-1	3	1	-2	2	-2	1	1	1	-1	1	2	0	-1	2	3	0	-2	2	1	3	3	2	2	3	2	3	-2	2	-1	-1	0	-3	1	1	2	-3	0	-2	-1	1	1	-1	1	-2	1	-1	3	1
S18	-1	2	2	1	0	-1	0	0	1	0	-3	1	3	1	0	1	0	-2	1	1	2	0	0	1	1	1	0	1	0	-2	0	1	0	0	2	0	0	1	1	-2	0	3	3	2	-1	3	0	0	-1
S19	-2	-2	0	0	-1	-3	-2	0	-1	-3	-2	-2	-3	1	-1	0	1	0	-2	0	1	1	2	3	-3	0	0	0	0	1	1	-1	1	3	0	2	0	-2	0	0	0	2	2	-3	-1	1	-2	0	1
S20	1	3	1	0	1	-1	-2	-2	-2	2	0	0	0	2	0	-1	-1	-1	1	-3	1	3	1	1	-3	2	-1	-1	2	0	1	2	0	0	-1	1	-1	1	0	2	1	0	-2	0	-1	1	0	0	2
S21	3	3	1	0	1	3	1	2	3	1	0	0	-1	-1	1	1	3	3	2	-1	-2	1	-1	0	1	-1	0	3	2	0	-2	-1	1	-1	0	-2	2	3	0	2	2	2	-2	-1	0	-1	1	1	0
S22	0	-3	-2	0	0	0	-2	2	0	2	0	2	2	-3	1	-1	-1	1	0	-1	0	0	2	1	-3	-2	0	0	2	0	1	-1	1	-1	0	-1	0	-1	0	1	0	-1	0	-2	0	0	1	1	2
S23	-2	-2	1	0	-2	-1	-3	-1	-1	-1	-1	-3	-3	-3	-3	-3	0	-2	1	2	-3	2	-2	-1	-2	0	-1	-3	-3	-2	-2	-2	0	-3	-2	0	-3	-1	0	-2	-3	0	1	0	-3	-3	2	-3	-3
S24	2	-2	-3	-1	-2	0	2	3	3	0	3	-3	0	0	0	-3	0	2	2	3	0	1	-2	-3	0	1	-3	1	1	2	-2	-1	3	0	-1	1	1	1	-1	-1	1	-2	1	2	2	2	2	-3	3
S25	0	2	2	-2	1	1	-3	-1	-3	-1	1	1	0	-2	-2	2	-1	2	-1	-2	0	-2	-1	1	2	-2	-3	-2	-1	0	-1	0	-2	2	2	-1	1	2	-2	-2	0	-1	1	1	2	-1	2	-2	-1
S26	1	2	3	1	2	3	1	2	0	2	1	3	3	3	2	2	2	1	1	3	3	-1	3	3	0	1	2	1	0	1	2	3	2	2	1	2	1	2	1	2	3	0	2	2	2	2	2	3	1
S27	-1	2	2	-1	-2	1	2	1	2	0	3	-1	3	1	1	3	0	1	1	3	-2	-2	3	0	2	1	-2	0	-1	1	2	0	0	2	2	1	-1	0	-1	-1	-1	1	3	-1	-2	1	3	-2	-1
S28	-1	3	-1	1	2	0	1	-1	2	0	2	0	-1	3	-1	2	-1	-2	0	1	1	-1	1	0	0	1	2	1	-1	1	0	2	-2	0	-3	-1	2	1	1	1	1	0	0	3	1	3	0	1	-1
S29	2	1	0	-1	1	1	3	0	0	3	2	1	0	-1	2	-1	-1	0	0	0	2	0	-1	2	-3	1	1	0	1	0	0	-1	0	-1	3	0	0	0	-1	3	1	-1	-1	-2	1	2	0	0	2
S30	-2	-1	-1	-2	-2	-3	-3	0	-3	1	2	-1	-1	-1	-1	0	0	-2	-1	0	-1	2	1	1	2	0	-1	2	3	-1	-1	0	-1	0	1	0	1	3	-2	0	0	-1	3	0	0	-1	-2	0	3
S31	-1	0	-1	2	-3	0	-1	-2	-1	1	-2	-1	-1	0	0	-2	2	-2	0	2	0	0	-2	0	1	3	0	0	1	0	1	1	-1	1	1	1	-2	2	2	0	-1	1	3	2	2	2	2	1	2
S32	0	2	-2	3	3	0	1	1	2	0	-1	0	2	3	2	0	3	1	0	1	0	2	0	0	-1	0	2	-1	-1	1	1	2	-2	-1	-1	3	2	3	3	3	1	1	1	0	-1	1	0	-1	2
S33	-1	2	3	-1	2	2	2	2	1	1	0	0	2	0	0	1	3	2	3	1	2	2	0	3	-2	-1	1	2	3	-3	0	1	1	2	1	0	1	2	-1	0	2	1	-1	0	2	2	0	2	0
S34	1	-1	-3	1	-1	-3	-1	-2	-2	-2	-1	0	-2	2	1	-1	-3	-1	-3	-2	0	1	0	-2	3	0	-2	-1	0	-2	-1	-1	0	-3	-1	0	-1	-2	1	1	-3	-2	-3	0	-1	0	-1	-1	0
S35	-2	-1	1	-2	-1	-2	-2	-3	-2	2	-2	-3	-2	-1	-3	-2	-3	-1	0	-3	-3	1	-1	-1	-2	1	-2	1	-2	1	0	-2	-3	-3	-3	-3	-1	-2	-2	-1	-2	0	1	-2	-2	-2	-3	-3	-1
S36	2	-1	-1	0	-3	0	-1	0	2	-1	-3	-2	1	0	-1	-1	-2	2	-2	-2	2	1	-2	-1	-1	1	-1	-1	0	-1	2	1	1	-1	2	0	-1	-1	0	0	-2	-2	0	1	0	0	-1	-1	0
S37	-3	0	-1	-2	-1	-2	1	0	-2	-2	-1	1	-3	-1	-3	0	0	-1	-1	-3	-2	-2	1	-1	-2	-3	-1	0	0	1	-2	-2	-2	-2	-2	-1	-1	-2	-2	-2	1	-1	-2	-2	-2	0	1	0	-2
S38	-2	1	0	2	0	-1	1	-2	-1	0	0	-2	-1	-1	-1	-1	-1	0	0	-2	0	0	0	-1	-2	-2	-1	-1	1	-3	0	0	-1	-2	-3	-1	-2	1	2	-2	-2	0	-2	3	-1	1	1	0	-1
S39	3	1	1	1	3	2	2	3	0	3	2	2	1	1	3	0	2	0	0	2	1	2	0	0	0	2	1	3	1	2	2	2	3	1	3	1	1	1	1	3	2	0	2	1	-2	-2	2	2	-2
S40	1	1	2	-1	3	1	3	1	0	3	3	3	3	2	3	1	2	3	3	1	1	0	2	-2	3	2	3	3	2	1	3	3	3	2	3	-2	3	3	-1	3	3	-2	-1	0	3	-1	1	3	0
S41	1	-3	0	1	1	2	-1	-3	-1	-2	-2	-1	-1	0	0	-1	1	0	-1	-1	-2	-2	-1	-2	0	-1	0	1	2	-1	-1	0	-2	0	2	1	-2	-2	1	-1	0	-1	-3	1	0	-2	-1	-1	1
S42	0	-2	-1	-1	-1	-1	0	-2	-3	-2	-2	-3	-2	0	-3	0	-2	0	-3	-1	-1	0	1	0	3	-2	3	-2	-2	0	-2	-2	-1	0	-3	-2	3	2	-1	-1	-3	-3	0	-2	0	-3	-3	-1	-3
S43	1	0	0	0	0	0	0	-3	-1	-2	1	1	1	2	-1	1	-2	1	-2	0	-1	1	-1	-1	0	-1	0	-1	0	3	0	-2	1	0	-1	-2	1	-1	0	-1	3	-1	-2	-1	1	0	0	-2	2
S44	3	1	2	0	2	2	3	3	0	1	3	3	2	-1	3	0	2	3	0	0	-1	-1	2	-1	2	0	3	3	3	3	3	0	3	3	3	0	3	2	0	0	0	0	2	2	0	-1	1	2	3
S45	0	0	0	2	0	-2	0	1	-3	0	0	0	0	-2	-1	-3	-3	-3	-1	0	-1	-2	0	0	-1	-1	0	-3	-3	-1	2	-2	-3	0	0	2	-3	-3	2	0	3	-3	0	-1	-2	0	-3	2	-2
S46	2	0	0	2	1	2	-1	0	1	1	2	-1	0	-2	0	1	-3	0	-2	2	0	-1	-3	-1	0	0	0	-3	3	-1	1	1	2	2	-2	0	0	-3	2	-1	0	1	1	-1	0	1	0	0	3
[truncated: 5 more columns]
